# Supplementary material for: Hospitalization, Mechanical Ventilation, and Mortality After COVID-19 Among Adults With or Without Serious Mental Illness
Source: Atypon-hosted journal article supplement (doi:10.1176/appi.ps.202100151), 2021-07-29
Supplement: appi.ps.202100151.ds001.pdf [file appi.ps.202100151.ds001.pdf]

### **A. Procedure and Diagnostic Codes**

Serious Mental Illness: Schizophrenia (F20), Schizotypal disorder (F21) Schizoaffective disorder (F25); Bipolar Disorder (F31); Other Serious Psychiatric Conditions (F22, F28, F29)

Comorbidities: Diabetes (E08-E13), hypertension (I10), ischemic heart disease (I20-I25), overweight and obesity (E66), chronic kidney disease (N18), chronic obstructive pulmonary disease (J44), asthma (J45), cerebrovascular disease (I60-I69), nicotine dependence (F17), substance use disorder (F10-F19)

COVID-19: ICD-10 code (B34.2, B97.29, J12.81, U07.1, U07.2) or Logical Observation Identifiers Names and Codes (LOINC) (94500-6, 94315-9, 94533-7, 94534-5, 94559-2). Excluded if ICD-10 code of B97.89

Mechanical Ventilation: CPT codes (39.65, 31500, A1935Z, 5A1945Z, 5A1955Z, 1015098, 0BH17EZ, 0BH13EZ, 0BH18EZ, and 1022227)

## B. Supplemental Analysis

**Table S1:** Demographic characteristics and comorbidities of unmatched and matched cohorts for persons with and without serious mental illness (SMI) diagnosed with COVID-19 between January 20, 2020 and January 19, 2021.

|                         | Unmatched       |      |                       |      |         | Matched         |      |                    |      |         |
|-------------------------|-----------------|------|-----------------------|------|---------|-----------------|------|--------------------|------|---------|
|                         | SMI<br>N=85,257 |      | No SMI<br>N=2,422,601 |      | p-value | SMI<br>N=85,257 |      | No SMI<br>N=85,257 |      | p-value |
|                         | N               | %    | N                     | %    |         | N               | %    | N                  | %    |         |
| <b>Age</b>              |                 |      |                       |      |         |                 |      |                    |      |         |
| 18-44 years             | 38,357          | 45.0 | 1,015,466             | 41.9 | <0.0001 | 38,357          | 45.0 | 38,232             | 44.8 | 0.55    |
| 45-64 years             | 30,626          | 35.9 | 784,430               | 32.3 | <0.0001 | 30,626          | 35.9 | 30,619             | 35.9 | 0.98    |
| ≥65 years               | 16,274          | 19.1 | 623,705               | 25.7 | <0.0001 | 16,274          | 19.1 | 16,406             | 19.2 | 0.42    |
| <b>Sex</b>              |                 |      |                       |      |         |                 |      |                    |      |         |
| Female                  | 49,797          | 58.4 | 1,378,545             | 56.9 | <0.0001 | 49,797          | 58.4 | 49,713             | 58.3 | 0.68    |
| Male                    | 35,311          | 41.4 | 1,023,647             | 42.3 | <0.0001 | 35,311          | 41.4 | 35,401             | 41.5 | 0.66    |
| <b>Race</b>             |                 |      |                       |      |         |                 |      |                    |      |         |
| White                   | 56,705          | 66.5 | 1,624,848             | 67.1 | 0.0006  | 56,705          | 66.5 | 56,735             | 66.5 | 0.88    |
| Black                   | 19,146          | 22.5 | 339,146               | 14.0 | <0.0001 | 19,146          | 22.5 | 19,252             | 22.6 | 0.53    |
| Asian                   | 659             | 0.8  | 56,924                | 2.4  | <0.0001 | 659             | 0.8  | 6363               | 0.7  | 0.52    |
| Other                   | 372             | 0.4  | 12,693                | 0.5  | <0.001  | 372             | 0.4  | 321                | 0.4  | 0.01    |
| Unknown                 | 8,375           | 9.8  | 388,990               | 16.1 | <0.0001 | 8,375           | 9.8  | 8,313              | 9.8  | 0.61    |
| <b>Ethnicity</b>        |                 |      |                       |      |         |                 |      |                    |      |         |
| Non-Hispanic            | 64,202          | 75.3 | 1,600,114             | 66.0 | <0.0001 | 64,202          | 75.3 | 64,319             | 75.4 | 0.51    |
| Hispanic                | 4,655           | 5.5  | 204,181               | 8.4  | <0.0001 | 4,655           | 5.5  | 4,604              | 5.4  | 0.59    |
| Unknown                 | 16,400          | 19.2 | 618,306               | 25.5 | <0.0001 | 16,400          | 19.2 | 16,334             | 19.2 | 0.68    |
| <b>Comorbidities</b>    |                 |      |                       |      |         |                 |      |                    |      |         |
| Diabetes                | 19,459          | 22.8 | 290,193               | 12.0 | <0.0001 | 19,459          | 22.8 | 19,505             | 22.9 | 0.79    |
| Hypertension            | 36,926          | 43.3 | 663,870               | 27.4 | <0.0001 | 36,926          | 43.3 | 37,038             | 43.4 | 0.58    |
| Asthma                  | 18,741          | 22.0 | 221,723               | 9.2  | <0.0001 | 18,741          | 22.0 | 18,704             | 21.9 | 0.83    |
| COPD                    | 11,988          | 14.1 | 115,115               | 4.8  | <0.0001 | 11,988          | 14.1 | 11,923             | 14.0 | 0.65    |
| Ischemic heart Disease  | 12,750          | 15.0 | 226,124               | 9.3  | <0.0001 | 12,750          | 15.0 | 12,726             | 12.9 | 0.87    |
| Overweight/<br>Obesity  | 25,551          | 30.0 | 384,988               | 15.9 | <0.0001 | 25,551          | 30.0 | 25,570             | 30.0 | 0.92    |
| Cerebrovascular Disease | 9,463           | 11.1 | 132,951               | 5.5  | <0.0001 | 9,463           | 11.1 | 9,457              | 11.1 | 0.96    |
| Chronic kidney disease  | 8,587           | 10.1 | 138,917               | 5.8  | <0.0001 | 8,587           | 10.1 | 8,676              | 10.2 | 0.47    |
| Nicotine dependence     | 33,201          | 38.9 | 236,148               | 9.8  | <0.0001 | 33,201          | 38.9 | 33,194             | 38.9 | 0.97    |
| Substance use disorder  | 44,696          | 52.4 | 315,514               | 13.0 | <0.0001 | 44,695          | 52.4 | 44,695             | 52.4 | 1.00    |

**Table S2:** Demographic characteristics and comorbidities of unmatched and matched cohorts for persons with and without serious mental illness (SMI) with an inpatient admission and a COVID-19 diagnosis between January 20, 2020 and January 19, 2021.

|                         | Unmatched       |      |                     |      |         | Matched         |      |                    |      |         |
|-------------------------|-----------------|------|---------------------|------|---------|-----------------|------|--------------------|------|---------|
|                         | SMI<br>N=27,443 |      | No SMI<br>N=459,669 |      | p-value | SMI<br>N=27,443 |      | No SMI<br>N=27,443 |      | p-value |
|                         | N               | %    | N                   | %    |         | N               | %    | N                  | %    |         |
| <b>Age</b>              |                 |      |                     |      |         |                 |      |                    |      |         |
| 18-44 years             | 10,798          | 39.3 | 138,142             | 30.1 | <0.0001 | 10,798          | 39.3 | 10,759             | 30.2 | 0.73    |
| 45-64 years             | 10,019          | 36.5 | 137,452             | 29.9 | <0.0001 | 10,019          | 36.5 | 10,033             | 36.6 | 0.90    |
| ≥65 years               | 6,626           | 24.1 | 184,075             | 40.0 | <0.0001 | 6,626           | 24.1 | 6,651              | 24.2 | 0.80    |
| <b>Sex</b>              |                 |      |                     |      |         |                 |      |                    |      |         |
| Female                  | 15,446          | 56.3 | 262,669             | 57.1 | 0.005   | 15,446          | 56.2 | 15,393             | 56.1 | 0.65    |
| Male                    | 11,955          | 43.6 | 195,722             | 42.6 | 0.001   | 11,955          | 43.6 | 12,011             | 43.8 | 0.63    |
| <b>Race</b>             |                 |      |                     |      |         |                 |      |                    |      |         |
| White                   | 17,666          | 64.4 | 308,760             | 67.2 | <0.0001 | 17,666          | 64.4 | 17,717             | 64.6 | 0.65    |
| Black                   | 6,763           | 24.6 | 81,201              | 17.7 | <0.0001 | 6,763           | 24.6 | 6,810              | 24.8 | 0.64    |
| Asian                   | 210             | 0.8  | 11,183              | 2.4  | <0.001  | 210             | 0.8  | 178                | 0.6  | 0.10    |
| Other                   |                 |      |                     |      |         |                 |      |                    |      |         |
| Unknown                 | 2,691           | 9.8  | 55,987              | 12.2 | <0.0001 | 2,691           | 9.8  | 2,644              | 9.6  | 0.49    |
| <b>Ethnicity</b>        |                 |      |                     |      |         |                 |      |                    |      |         |
| Non-Hispanic            | 21,886          | 79.8 | 357,741             | 77.8 | <0.0001 | 21,886          | 79.8 | 21,978             | 80.1 | 0.33    |
| Hispanic                | 1,246           | 4.5  | 40,736              | 8.9  | <0.0001 | 1,246           | 4.5  | 1,148              | 4.2  | 0.04    |
| Unknown                 | 4,311           | 15.7 | 61,192              | 13.3 | <0.0001 | 4,311           | 15.7 | 4,317              | 15.7 | 0.94    |
| <b>Comorbidities</b>    |                 |      |                     |      |         |                 |      |                    |      |         |
| Diabetes                | 7,669           | 27.9 | 91,849              | 20.0 | <0.0001 | 7,669           | 27.9 | 7,618              | 27.8 | 0.63    |
| Hypertension            | 13,655          | 49.8 | 183,653             | 40.0 | <0.0001 | 13,655          | 49.8 | 13,700             | 49.9 | 0.70    |
| Asthma                  | 5,778           | 21.1 | 44,778              | 9.7  | <0.0001 | 5,778           | 21.1 | 5,739              | 20.9 | 0.69    |
| COPD                    | 5,160           | 18.8 | 43,890              | 9.5  | <0.0001 | 5,160           | 18.8 | 5,106              | 18.6 | 0.55    |
| Ischemic heart Disease  | 5,905           | 21.5 | 87,069              | 12.9 | <0.0001 | 5,905           | 21.5 | 5,866              | 21.4 | 0.69    |
| Overweight and Obesity  | 8,572           | 31.2 | 98,833              | 21.5 | <0.0001 | 8,572           | 31.2 | 8,572              | 31.2 | 1.00    |
| Cerebrovascular Disease | 4,125           | 15.0 | 51,561              | 11.2 | <0.0001 | 4,125           | 15.0 | 4,114              | 15.0 | 0.90    |
| Chronic kidney Disease  | 3,931           | 14.3 | 55,571              | 12.1 | <0.0001 | 3,931           | 14.3 | 3,958              | 14.4 | 0.74    |
| Nicotine dependence     | 11,548          | 42.1 | 62,580              | 13.6 | <0.0001 | 11,548          | 42.1 | 11,552             | 42.1 | 0.97    |
| Substance use disorder  | 14,999          | 54.7 | 82,543              | 18.0 | <0.0001 | 14,999          | 54.7 | 14,973             | 54.6 | 0.82    |

**Table S3:** Clinical outcomes within 30 days of COVID-19 diagnosis among persons with and without serious mental illness prior to matching on demographics and comorbid conditions in the first year of the pandemic (January 20, 2020 and January 19, 2021).

| Diagnosed with COVID-19                                     |                              |      |                                    |      |                                                  |           |         |
|-------------------------------------------------------------|------------------------------|------|------------------------------------|------|--------------------------------------------------|-----------|---------|
|                                                             | Persons with SMI<br>N=85,257 |      | Persons without SMI<br>N=2,422,601 |      | Persons with versus<br>Persons without SMI (ref) |           |         |
|                                                             | N                            | %    | N                                  | %    | Odds Ratio                                       | 95% CI    | p-value |
| <b>Admission</b>                                            | 23,320                       | 27.3 | 412,834                            | 17.0 | 1.83                                             | 1.81-1.86 | <0.001  |
| <b>Death</b>                                                | 926                          | 1.1  | 20,894                             | 0.9  | 1.26                                             | 1.18-1.35 | <0.001  |
| Diagnosed with COVID-19 with associated inpatient admission |                              |      |                                    |      |                                                  |           |         |
|                                                             | Persons with SMI<br>N=27,443 |      | Persons without SMI<br>N=459,669   |      | Persons with versus<br>Persons without SMI (ref) |           |         |
|                                                             | N                            | %    | N                                  | %    | Odds Ratio                                       | 95% CI    | p-value |
| <b>Mechanical ventilation</b>                               | 1,461                        | 5.3  | 21,601                             | 4.7  | 1.14                                             | 1.08-1.20 | <0.001  |
| <b>Death</b>                                                | 699                          | 2.5  | 14,712                             | 3.2  | 0.79                                             | 0.73-0.85 | <0.001  |

**Table S4:** Clinical outcomes within 30 days of COVID-19 diagnosis among persons with and without serious mental illness after matching on demographics alone in the first year of the pandemic (January 20, 2020 and January 19, 2021).

| Diagnosed with COVID-19                                     |                              |      |                                 |      |                                                  |           |         |
|-------------------------------------------------------------|------------------------------|------|---------------------------------|------|--------------------------------------------------|-----------|---------|
|                                                             | Persons with SMI<br>N=90,159 |      | Persons without SMI<br>N=90,159 |      | Persons with versus<br>Persons without SMI (ref) |           |         |
|                                                             | N                            | %    | N                               | %    | Odds Ratio                                       | 95% CI    | p-value |
| <b>Admission</b>                                            | 25,267                       | 28.0 | 15,644                          | 17.4 | 1.86                                             | 1.81-1.90 | <0.001  |
| <b>Death</b>                                                | 1,003                        | 1.1  | 675                             | 09.8 | 1.49                                             | 1.35-1.65 | <0.001  |
| Diagnosed with COVID-19 with associated inpatient admission |                              |      |                                 |      |                                                  |           |         |
|                                                             | Persons with SMI<br>N=28,090 |      | Persons without SMI<br>N=28,090 |      | Persons with versus<br>Persons without SMI (ref) |           |         |
|                                                             | N                            | %    | N                               | %    | Odds Ratio                                       | 95% CI    | p-value |
| <b>Mechanical ventilation</b>                               | 1,596                        | 5.7  | 1,348                           | 4.8  | 1.20                                             | 1.11-1.29 | <0.001  |
| <b>Death</b>                                                | 735                          | 2.6  | 726                             | 2.6  | 1.01                                             | 0.91-1.12 | 0.81    |

**Table S5:** Clinical outcomes within 30 days of COVID-19 diagnosis among persons with and without serious mental illness after matching on demographics and comorbid conditions in the first four months of the pandemic (January 20, 2020 to May 31, 2020).

| Diagnosed with COVID-19                                     |                              |      |                                 |      |                                                  |           |         |
|-------------------------------------------------------------|------------------------------|------|---------------------------------|------|--------------------------------------------------|-----------|---------|
|                                                             | Persons with SMI<br>N=18,913 |      | Persons without SMI<br>N=18,913 |      | Persons with versus<br>Persons without SMI (ref) |           |         |
|                                                             | N                            | %    | N                               | %    | Odds Ratio                                       | 95% CI    | p-value |
| <b>Admission</b>                                            | 3,275                        | 17.3 | 2,744                           | 14.5 | 1.23                                             | 1.17-1.30 | <0.001  |
| <b>Death</b>                                                | 348                          | 1.8  | 295                             | 1.6  | 1.18                                             | 1.01-1.38 | 0.04    |
| Diagnosed with COVID-19 with associated inpatient admission |                              |      |                                 |      |                                                  |           |         |
|                                                             | Persons with SMI<br>N=5,961  |      | Persons without SMI<br>N=5,961  |      | Persons with versus<br>Persons without SMI (ref) |           |         |
|                                                             | N                            | %    | N                               | %    | Odds Ratio                                       | 95% CI    | p-value |
| <b>Mechanical ventilation</b>                               | 267                          | 4.5  | 273                             | 4.6  | 0.98                                             | 0.82-1.16 | 0.79    |

|              |     |     |     |     |      |           |      |
|--------------|-----|-----|-----|-----|------|-----------|------|
| <b>Death</b> | 234 | 3.9 | 222 | 3.7 | 1.06 | 0.88-1.27 | 0.57 |
|--------------|-----|-----|-----|-----|------|-----------|------|

**Table S6:** Clinical outcomes within 30 days of COVID-19 diagnosis by positive SARS-CoV2 laboratory test among persons with and without serious mental illness after matching on demographics and comorbid conditions in the first year of the pandemic (January 20, 2020 to January 19, 2021).

| <b>Diagnosed with COVID-19</b>                                     |                                     |          |                                        |          |                                                      |               |                |
|--------------------------------------------------------------------|-------------------------------------|----------|----------------------------------------|----------|------------------------------------------------------|---------------|----------------|
|                                                                    | <b>Persons with SMI</b><br>N=87,566 |          | <b>Persons without SMI</b><br>N=87,566 |          | <b>Persons with versus Persons without SMI (ref)</b> |               |                |
|                                                                    | <b>N</b>                            | <b>%</b> | <b>N</b>                               | <b>%</b> | <b>Odds Ratio</b>                                    | <b>95% CI</b> | <b>p-value</b> |
| <b>Admission</b>                                                   | 24,944                              | 28.5     | 18,108                                 | 20.7     | 1.53                                                 | 1.50-1.56     | <0.001         |
| <b>Death</b>                                                       | 872                                 | 1.0      | 766                                    | 0.9      | 1.14                                                 | 1.03-1.26     | <0.001         |
| <b>Diagnosed with COVID-19 with associated inpatient admission</b> |                                     |          |                                        |          |                                                      |               |                |
|                                                                    | <b>Persons with SMI</b><br>N=29,996 |          | <b>Persons without SMI</b><br>N=29,996 |          | <b>Persons with versus Persons without SMI (ref)</b> |               |                |
|                                                                    | <b>N</b>                            | <b>%</b> | <b>N</b>                               | <b>%</b> | <b>Odds Ratio</b>                                    | <b>95% CI</b> | <b>p-value</b> |
| <b>Mechanical ventilation</b>                                      | 1,207                               | 4.4      | 1,145                                  | 4.1      | 1.08                                                 | 0.99-1.17     | 0,06           |
| <b>Death</b>                                                       | 705                                 | 2.4      | 690                                    | 2.3      | 1.02                                                 | 0.92-1.14     | 0.68           |

**Table S7:** Clinical outcomes within 30 days among persons with and without serious mental illness admitted after COVID-19 diagnosis and treated with steroids after matching on demographics and comorbid conditions in the first year of the pandemic (January 20, 2020 to January 19, 2021).

| <b>Diagnosed with COVID-19 with associated inpatient admission and treated with dexamethasone or remdesivir</b> |                                     |          |                                        |          |                                                      |               |                |
|-----------------------------------------------------------------------------------------------------------------|-------------------------------------|----------|----------------------------------------|----------|------------------------------------------------------|---------------|----------------|
|                                                                                                                 | <b>Persons with SMI</b><br>N=11,081 |          | <b>Persons without SMI</b><br>N=11,081 |          | <b>Persons with versus Persons without SMI (ref)</b> |               |                |
|                                                                                                                 | <b>N</b>                            | <b>%</b> | <b>N</b>                               | <b>%</b> | <b>Odds Ratio</b>                                    | <b>95% CI</b> | <b>p-value</b> |
| <b>Mechanical ventilation</b>                                                                                   | 446                                 | 4.6      | 417                                    | 4.2      | 1.10                                                 | 0.96-1.26     | 0.16           |
| <b>Death</b>                                                                                                    | 280                                 | 2.5      | 275                                    | 2.5      | 1.02                                                 | 0.86-1.21     | 0.82           |

**Table S8:** Clinical outcomes within 30 days of COVID-19 diagnosis among persons with and without serious mental illness (using diagnostic code within 1 year of study period) after matching on demographics and comorbid conditions in the first year of the pandemic (January 20, 2020 to January 19, 2021).

| <b>Diagnosed with COVID-19</b>                                     |                                     |          |                                        |          |                                                      |               |                |
|--------------------------------------------------------------------|-------------------------------------|----------|----------------------------------------|----------|------------------------------------------------------|---------------|----------------|
|                                                                    | <b>Persons with SMI</b><br>N=72,734 |          | <b>Persons without SMI</b><br>N=72,734 |          | <b>Persons with versus Persons without SMI (ref)</b> |               |                |
|                                                                    | <b>N</b>                            | <b>%</b> | <b>N</b>                               | <b>%</b> | <b>Odds Ratio</b>                                    | <b>95% CI</b> | <b>p-value</b> |
| <b>Admission</b>                                                   | 22,565                              | 31.0     | 15,118                                 | 20.8     | 1.71                                                 | 1.67-1.76     | <0.001         |
| <b>Death</b>                                                       | 792                                 | 1.1      | 670                                    | 0.9      | 1.18                                                 | 1.07-1.31     | 0.001          |
| <b>Diagnosed with COVID-19 with associated inpatient admission</b> |                                     |          |                                        |          |                                                      |               |                |
|                                                                    | <b>Persons with SMI</b><br>N=26,902 |          | <b>Persons without SMI</b><br>N=26,902 |          | <b>Persons with versus Persons without SMI (ref)</b> |               |                |
|                                                                    | <b>N</b>                            | <b>%</b> | <b>N</b>                               | <b>%</b> | <b>Odds Ratio</b>                                    | <b>95% CI</b> | <b>p-value</b> |
| <b>Mechanical ventilation</b>                                      | 1,512                               | 5.7      | 1,448                                  | 5.4      | 1.05                                                 | 0.98-1.13     | 0.17           |
| <b>Death</b>                                                       | 638                                 | 2.4      | 690                                    | 2.6      | 0.92                                                 | 0.83-1.03     | 0.15           |

**Table S9:** Clinical outcomes within 30 days of COVID-19 diagnosis among persons with and without serious mental illness (using diagnostic codes within 7 years of study period) after matching on demographics and comorbid conditions in the first year of the pandemic (January 20, 2020 to January 19, 2021).

| <b>Diagnosed with COVID-19</b>                                     |                                     |          |                                        |          |                                                          |               |                |
|--------------------------------------------------------------------|-------------------------------------|----------|----------------------------------------|----------|----------------------------------------------------------|---------------|----------------|
|                                                                    | <b>Persons with SMI</b><br>N=98,999 |          | <b>Persons without SMI</b><br>N=98,999 |          | <b>Persons with versus<br/>Persons without SMI (ref)</b> |               |                |
|                                                                    | <b>N</b>                            | <b>%</b> | <b>N</b>                               | <b>%</b> | <b>Odds Ratio</b>                                        | <b>95% CI</b> | <b>p-value</b> |
| <b>Admission</b>                                                   | 26,845                              | 27.1     | 19,758                                 | 20.0     | 1.49                                                     | 1.46-1.52     | <0.001         |
| <b>Death</b>                                                       | 1,110                               | 1.1      | 882                                    | 0.9      | 1.26                                                     | 1.16-1.38     | <0.001         |
| <b>Diagnosed with COVID-19 with associated inpatient admission</b> |                                     |          |                                        |          |                                                          |               |                |
|                                                                    | <b>Persons with SMI</b><br>N=26,212 |          | <b>Persons without SMI</b><br>N=26,212 |          | <b>Persons with versus<br/>Persons without SMI (ref)</b> |               |                |
|                                                                    | <b>N</b>                            | <b>%</b> | <b>N</b>                               | <b>%</b> | <b>Odds Ratio</b>                                        | <b>95% CI</b> | <b>p-value</b> |
| <b>Mechanical ventilation</b>                                      | 1,168                               | 4.8      | 1,067                                  | 4.3      | 1.12                                                     | 1.03-1.22     | 0.008          |
| <b>Death</b>                                                       | 615                                 | 2.4      | 613                                    | 2.3      | 1.00                                                     | 0.90-1.12     | 0.94           |
